# Supplementary figures and images for: Ancestral genome reconstruction identifies the evolutionary basis for trait acquisition in polyphosphate accumulating bacteria
Source: PubMed Central journal article supplement — ISME J. 2016 Apr 29;10(12):2931–45. doi: 10.1038/ismej.2016.67 (PMC5148189; doi:10.1038/ismej.2016.67), 2016-04-29

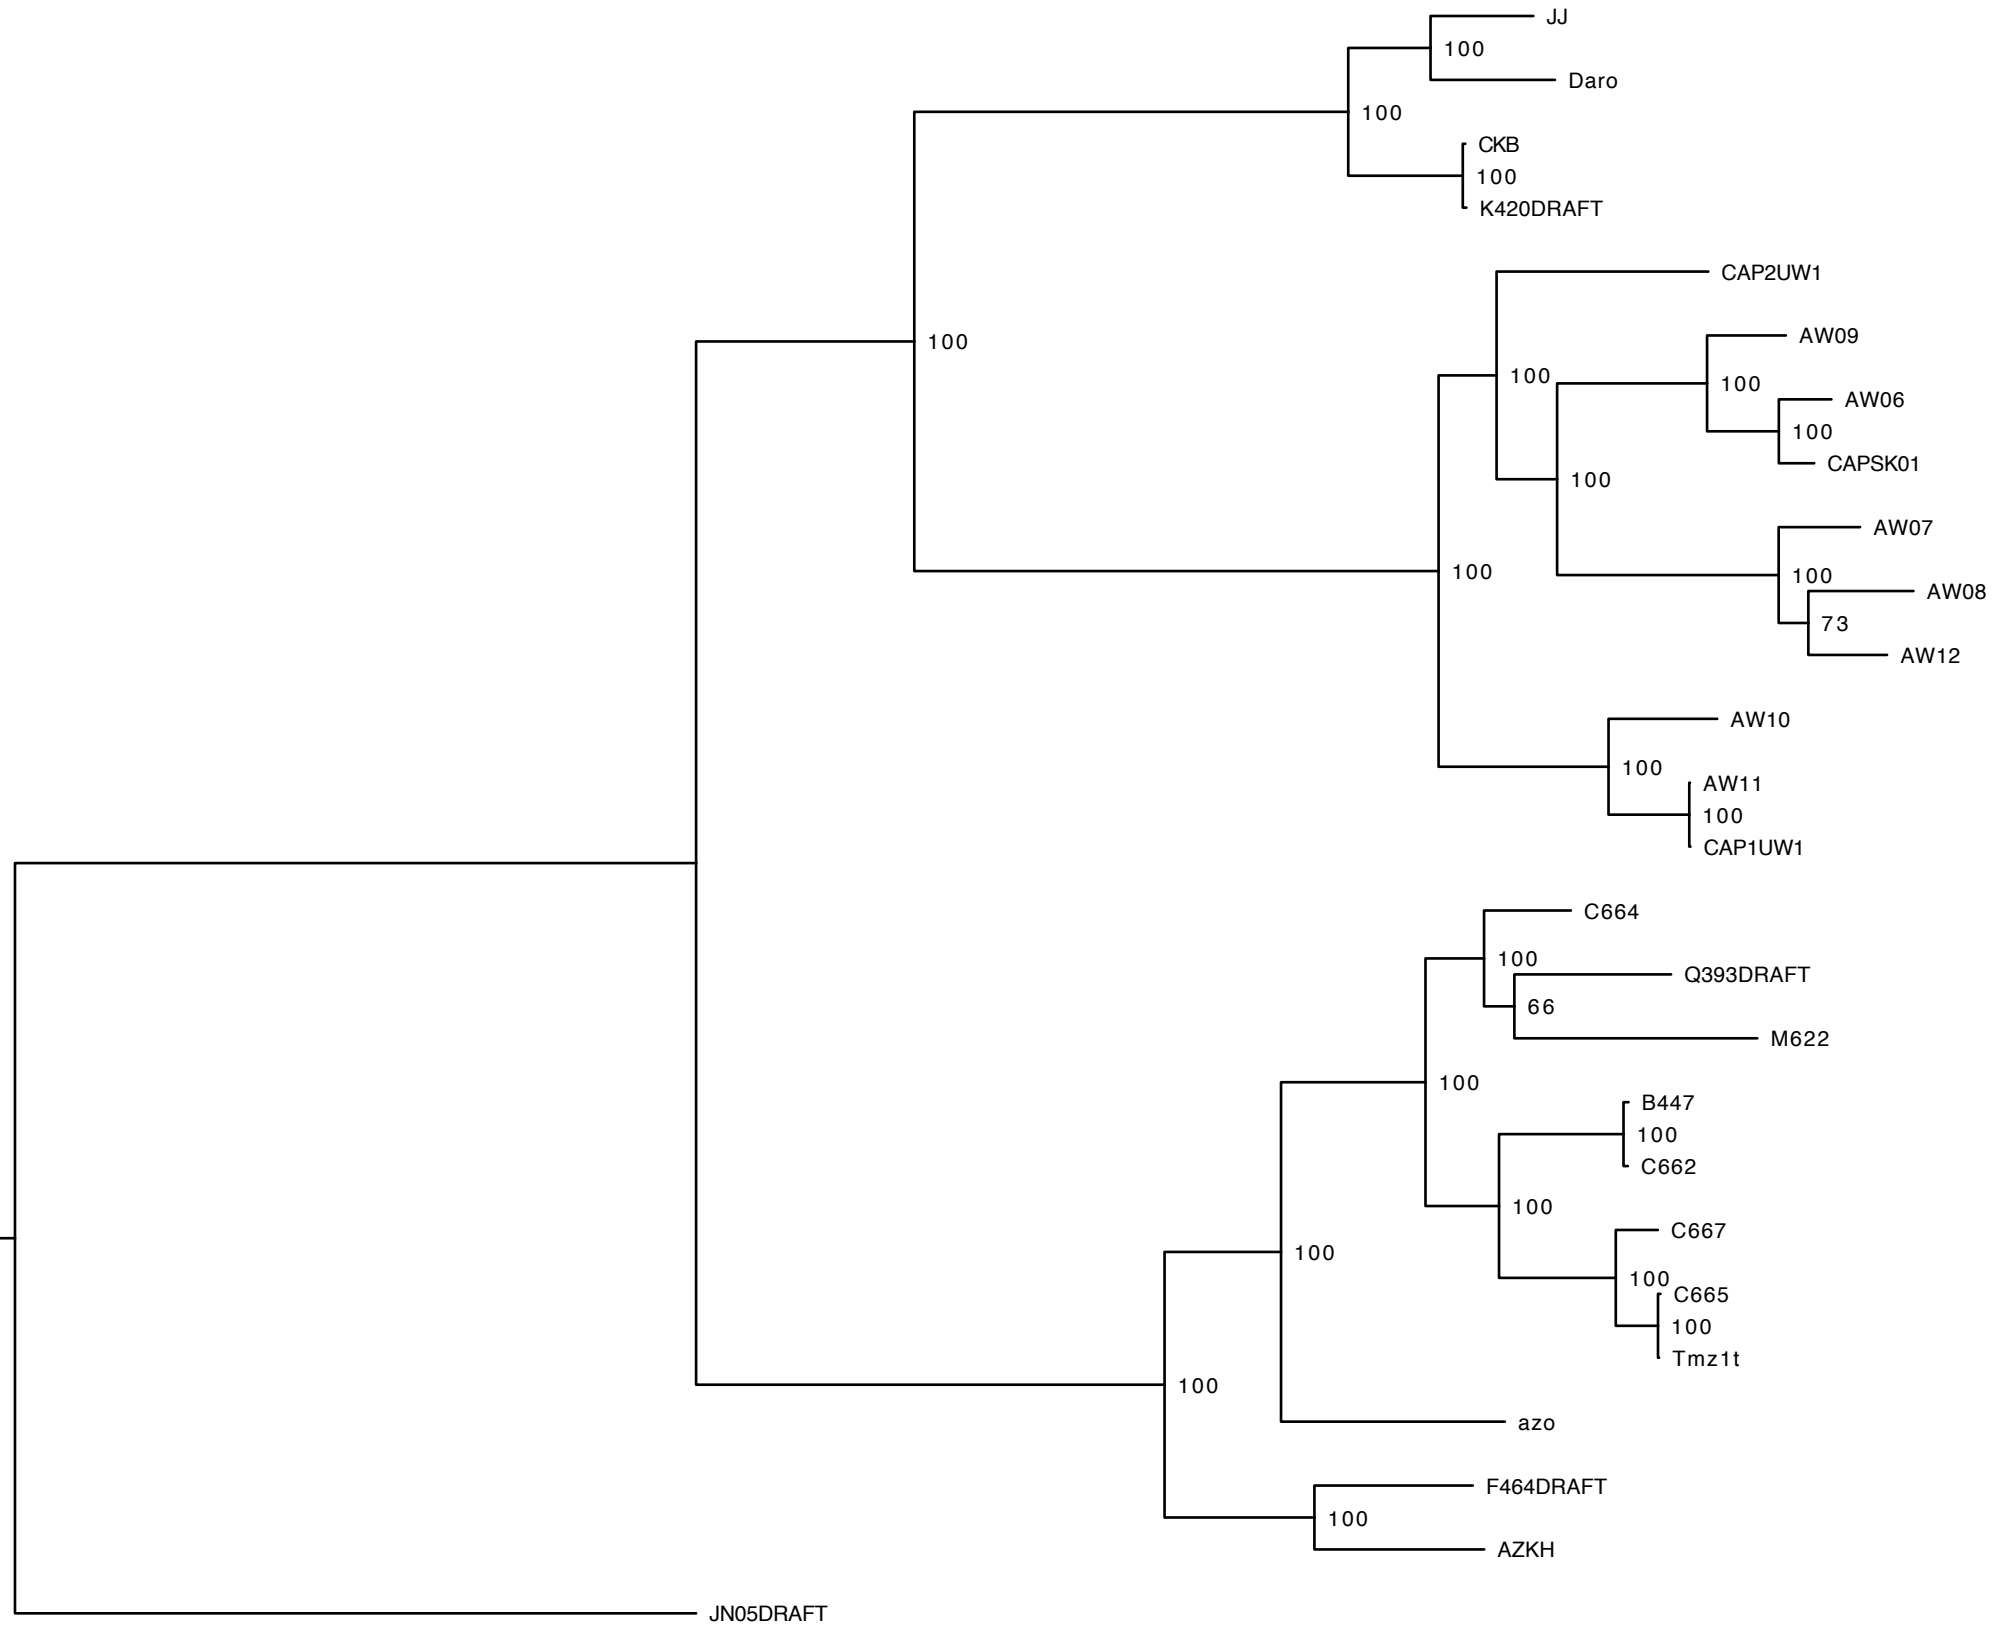

0.06

Supplement: ismej201667x2.pdf [file ismej201667x2.pdf]

| Node    | Present | Gained | Lost | Notes      |
|---------|---------|--------|------|------------|
| 13      | 1477*   | 275    | 31   | *Ancestral |
| 12      | 2459    | 1106*  | 124  | *Derived   |
| 11      | 3150    | 802    | 111  |            |
| 10      | 3559    | 481    | 72   |            |
| 9       | 2872    | 445    | 42   |            |
| 8       | 2873    | 96     | 95   |            |
| 7       | 3230    | 599    | 242  |            |
| 6       | 3124    | 54     | 160  |            |
| 5       | 3282    | 617    | 208  |            |
| 4       | 3505    | 359    | 136  |            |
| CAP1UW1 | 4250    | 1468   | 90   |            |
| AW09    | 4258    | 1391   | 315  |            |
| AW06    | 4134    | 778    | 149  |            |
| CAPSK01 | 4684    | 1595   | 416  |            |
| AW07    | 4087    | 1109   | 252  |            |
| AW08    | 3780    | 838    | 182  |            |
| AW12    | 2873    | 833    | 1084 |            |
| AW10    | 4076    | 1092   | 166  |            |
| AW11    | 3875    | 387    | 71   |            |
| CAP2UW1 | 3705    | 451    | 305  |            |

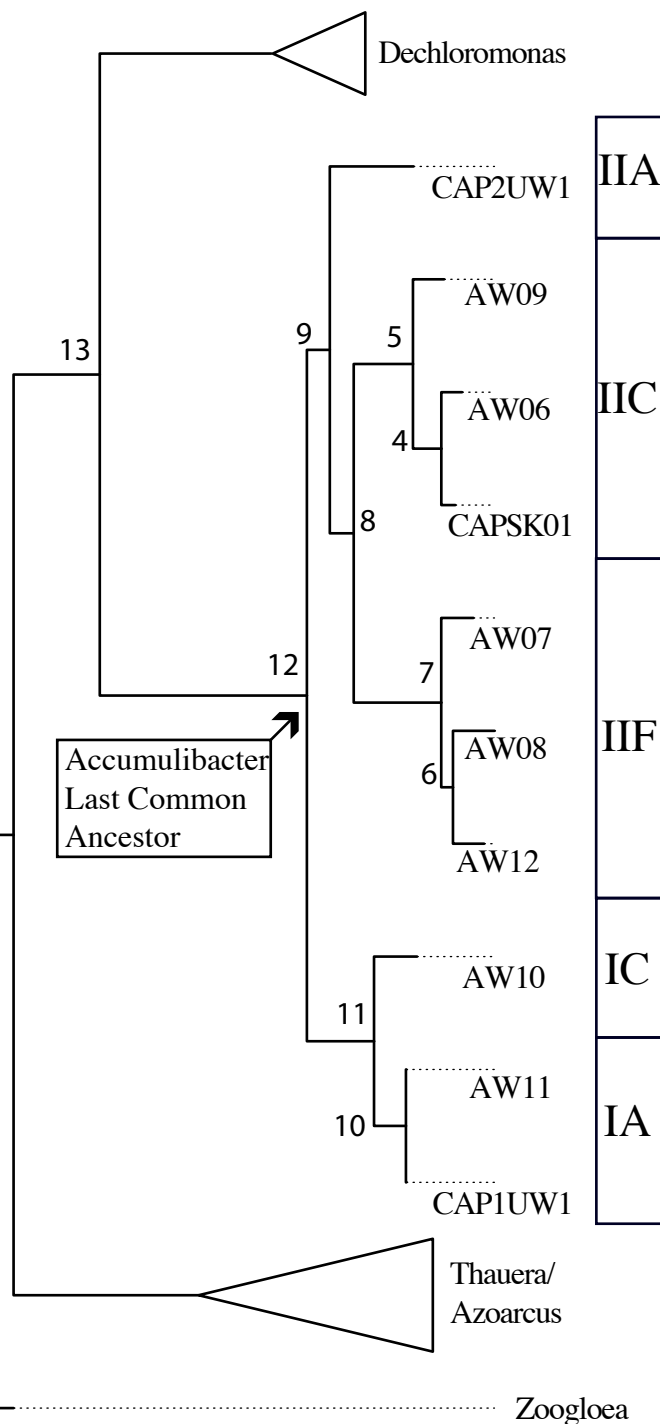

Supplement: ismej201667x3.pdf [file ismej201667x3.pdf]

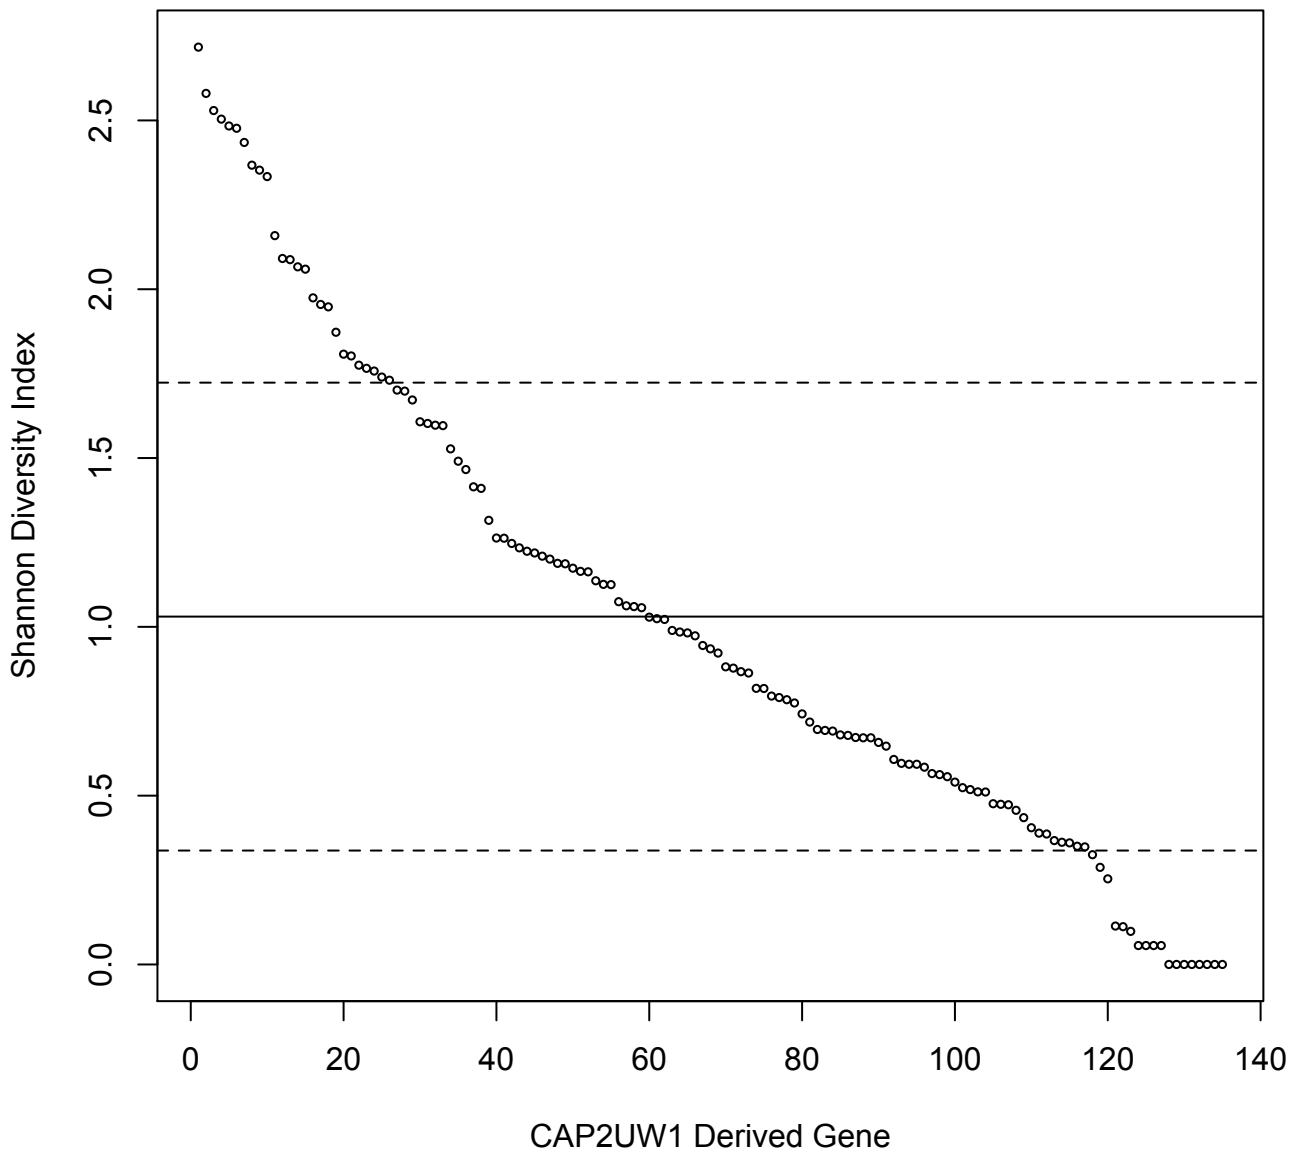

Supplement: ismej201667x4.pdf [file ismej201667x4.pdf]

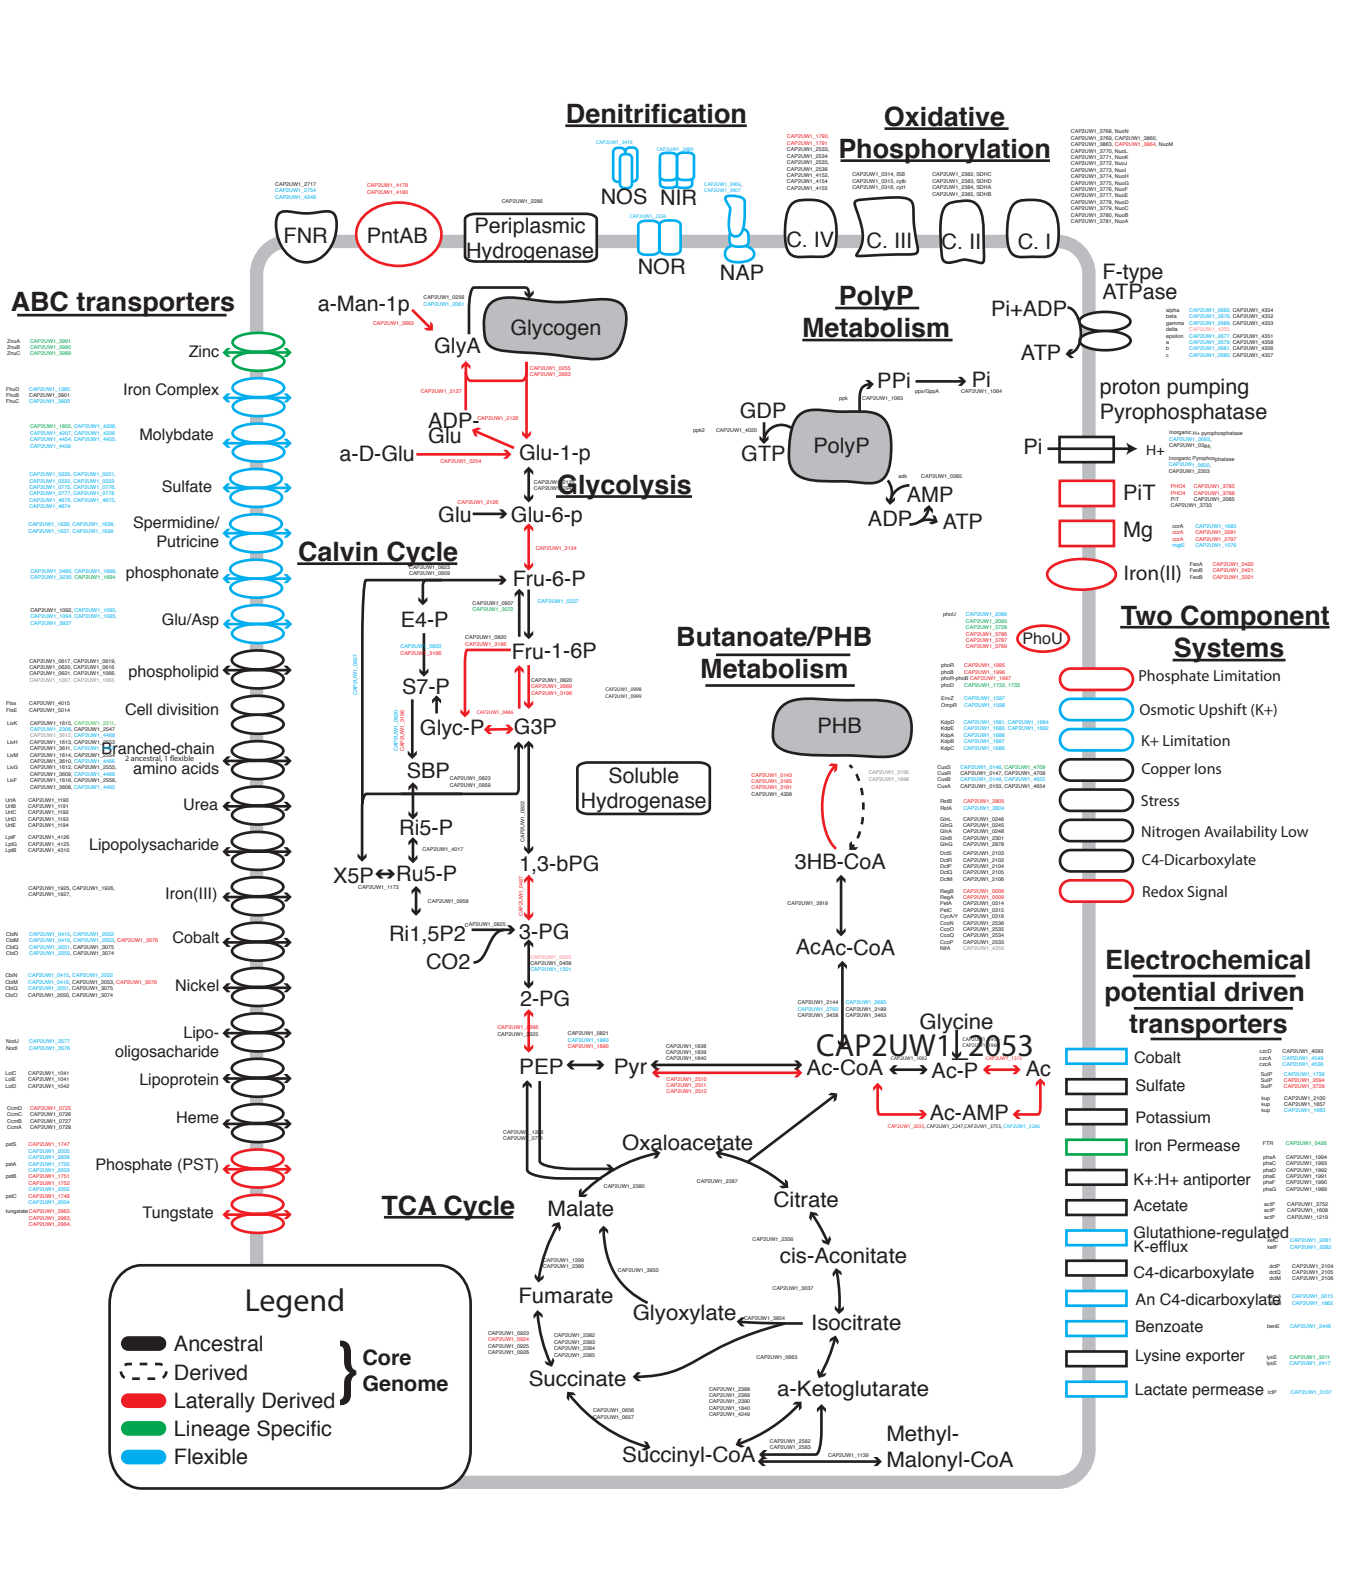

Supplement: ismej201667x5.pdf [file ismej201667x5.pdf]

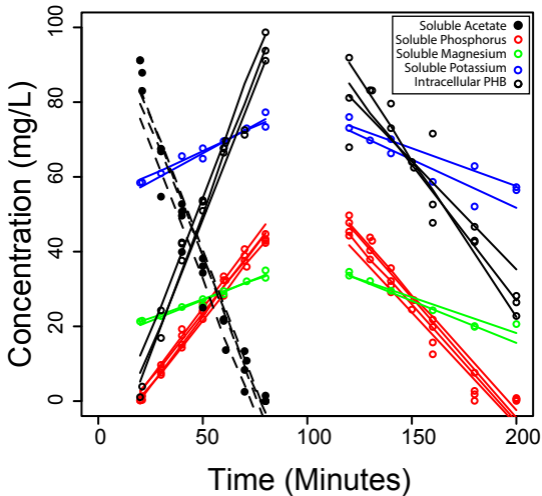

Supplement: ismej201667x6.pdf [file ismej201667x6.pdf]
